# Supplementary material for: Competition with Nonexclusive Contracts: Tackling the Hold-Up Problem
Source: publisher site journal article supplement (doi:10.1515/bejte-2018-0190), 2020-03-13
Supplement: Supplementary file 1 [file Supplementary Numeric_Simulation.pdf › Supplementary Numeric_Simulation.pdf]

## Numeric/Simulation

---

I develop a specific numerical solution of the model by using the following buyer's utility and the seller's costs functional forms:

$$U(X | b) = (b + 1) \left( X - \frac{X^2}{2} \right) - kb$$

$$C_1(x_1 | \sigma) = \frac{x_1^2}{2(\sigma + 1)} - \frac{\sigma^2}{2}, \text{ and } C_i(x_i) = \frac{x_i^2}{2}, \forall i \neq 1.$$

The efficient amount of trade is obtained when the marginal buyer's valuation is equal to the sellers' marginal production cost:

$$U_x(X | b) = (b + 1) \left( 1 - \left( x_1 + \sum_{i \neq 1}^N x_i \right) \right) = \frac{x_1}{\sigma + 1} = C_x(x_1 | \sigma),$$

$$U_x(X | b) = (b + 1) \left( 1 - \left( x_1 + \sum_{i \neq 1}^N x_i \right) \right) = x_i = C_x(x_i), \text{ for } i \neq 1$$

Restricting attention to symmetric equilibrium, in which  $x_i = x_{i'}$ , for  $i, i' \neq 1$ , gives the explicit solution:

$$x_1^* = \frac{(\sigma + 1)(b + 1)}{1 + (b + 1)(\sigma + N)}, \quad (0.1)$$

$$x_i^* = \frac{(b + 1)}{1 + (b + 1)(\sigma + N)}, \text{ for } i \neq 1, \quad (0.2)$$

$$X^* = x_1^* + (N - 1)x_i^* = \frac{(\sigma + 1)(b + 1)}{1 + (b + 1)(\sigma + N)} + \frac{(N - 1)(b + 1)}{1 + (b + 1)(\sigma + N)} = \frac{(b + 1)(\sigma + N)}{1 + (b + 1)(\sigma + N)}. \quad (0.3)$$

These solutions, satisfy Lemma (1), i.e.,  $dx_1^*/d\sigma > 0$ ,  $dx_j^*/d\sigma < 0$ ,  $\partial X^*/\partial \sigma > 0$ , and  $x_i^*(1, \sigma) > x_i^*(0, \sigma)$ .

$$\frac{dx_1^*}{d\sigma} = \frac{(b + 1)(1 + (b + 1)(N - 1))}{(1 + (b + 1)(\sigma + N))^2} > 0.$$

The allocative sensitivity is equal to:

$$\frac{dx_j^*}{d\sigma} = \frac{-(b + 1)^2}{(1 + (b + 1)(\sigma + N))^2} < 0, \text{ for } j \neq 1. \quad (0.4)$$

and the change in the aggregate amount of trade with respect to the seller's investment is:

$$\frac{dX^*}{d\sigma} = \frac{(b + 1)}{(1 + (b + 1)(\sigma + N))^2} > 0.$$

Moreover, trade from each seller increases when the buyer invests:

$$x_1^*(1, \sigma) = \frac{2(\sigma + 1)}{1 + 2(\sigma + N)} > \frac{\sigma + 1}{1 + \sigma + N} = x_1^*(0, \sigma) \iff 1 > 0.$$

$$x_i^*(1, \sigma) = \frac{2}{1 + 2(\sigma + N)} > \frac{1}{1 + \sigma + N} = x_i^*(0, \sigma) \iff 1 > 0, \text{ for } i \neq 1.$$

## 1. Seller's investment

In the most intense competition, the investment decision rule is efficient  $\psi_\sigma(\sigma) = -C_\sigma(x_1^*(\sigma, b) \mid \sigma)$ , and  $\sigma_b^*$  is implicitly defined by:

$$\sigma_b^* = \frac{\left( \frac{(\sigma_b^* + 1)(b + 1)}{1 + (b + 1)(\sigma_b^* + N)} \right)^2}{2(1 + \sigma_b^*)^2} = \frac{(b + 1)^2}{2(1 + (b + 1)(\sigma_b^* + N))^2}. \quad (1.1)$$

When competition is less intense, the seller's investing decision rule becomes:

$$\psi_\sigma(\sigma) = -C_\sigma(x_1^*(\sigma, b) \mid \sigma) - \frac{\partial \tilde{T}S_{-1}(b, \sigma \mid J_1)}{\partial \sigma}.$$

with

$$\frac{\partial \tilde{T}S_{-1}(b, \sigma \mid J_1)}{\partial \sigma} = [N - (1 + J_1)] \left[ U_x \left( X_{-\{J_1, 1\}}^* + \sum_{j \in J_1} \tilde{x}_j \right) - U_x(X^*) \right] \frac{dx_l^*}{d\sigma}$$

where sellers  $l \in N$  do not offer latent contracts. To obtain the input  $\tilde{x}_j$  in the latent contracts for any  $j \in J_1$ , I make use of the optimal condition:

$$U_x \left( X_{-\{J_1, 1\}}^* + \sum_{j \in J_1} \tilde{x}_j \right) = C_x(x_j^*)$$

Operating, and restricting attention to symmetric equilibrium, I obtain:

$$(b + 1) \left( 1 - \left( X_{-\{J_1, 1\}}^* + J_1 \tilde{x}_j \right) \right) = \tilde{x}_j \implies (b + 1) \left( 1 - \left( \frac{(N - (J_1 + 1))(b + 1)}{1 + (b + 1)(\sigma + N)} + J_1 \tilde{x}_j \right) \right) = \tilde{x}_j$$

which gives and explicit solution

$$\tilde{x}_j = \frac{(b + 1) [1 + (b + 1)(\sigma + J_1 + 1)]}{(1 + (b + 1)(\sigma + N))(1 + (b + 1)J_1)} \quad (1.2)$$

and

$$\begin{aligned} X_{-\{J_1, 1\}}^* + \sum_{j \in J_1} \tilde{x}_j &= \frac{(N - (J_1 + 1))(b + 1)}{1 + (b + 1)(\sigma + N)} + \frac{J_1(b + 1) [1 + (b + 1)(\sigma + J_1 + 1)]}{(1 + (b + 1)(\sigma + N))(1 + (b + 1)J_1)} \\ &= \frac{(b + 1) [N + (b + 1)J_1(N + \sigma) - 1]}{(1 + (b + 1)(\sigma + N))(1 + (b + 1)J_1)}, \end{aligned} \quad (1.3)$$

where  $X_{-\{J_1, 1\}}^*$  is obtained multiplying  $(N - (J_1 + 1))$  to expression (0.2). This solution satisfies Lemma

(2) (not trading with any seller  $i$  generates a smaller aggregate trade)  $X^* > X_{-\{J_1, 1\}}^* + \sum_{j \in J_1} \tilde{x}_j$ ,

$$X^* = \frac{(b + 1)(\sigma + N)}{1 + (b + 1)(\sigma + N)} > \frac{(b + 1) [N + (b + 1)J_1(N + \sigma) - 1]}{(1 + (b + 1)(\sigma + N))(1 + (b + 1)J_1)} = X_{-\{J_1, 1\}}^* + \sum_{j \in J_1} \tilde{x}_j$$

$$\iff (\sigma + N)(1 + (b + 1)(\sigma + N)) > N + (b + 1)J_1(N + \sigma) - 1 \iff \sigma > -1.$$

The solution for  $\tilde{x}_j$  satisfies Lemma (3) (the input offered in the latent contracts is non-increasing with the number of sellers who offer latent contracts). To see this, I use a continuous approximation for the set  $J_1$  to obtain:

$$\frac{\partial \tilde{x}_j}{\partial J_1} = \frac{-(b+1)^3 ((\sigma+1)(1+(b+1)(\sigma+N)))}{[(1+(b+1)(\sigma+N))(1+(b+1)J_1)]^2} < 0.$$

Introducing  $X_{-\{J_1,1\}}^* + \sum_{j \in J_1} \tilde{x}_j$ ,  $X^*$  and  $dx_l^*/d\sigma$  into expression  $(\partial \tilde{T}S_{-1}(b, \sigma | J_1))/\partial \sigma$ , I get:

$$\begin{aligned} \frac{\partial \tilde{T}S_{-1}(b, \sigma | J_1)}{\partial \sigma} &= (N - (J_1 + 1)) \left[ \frac{(b+1)^2(\sigma+N)}{1+(b+1)(\sigma+N)} - \frac{(b+1)^2 [N(1+(b+1)J_1) + J_1(b+1)\sigma - 1]}{(1+(b+1)(\sigma+N))(1+(b+1)J_1)} \right] \frac{dx_l^*}{d\sigma} \\ &= -(N - (J_1 + 1)) \left[ \frac{(b+1)^2(\sigma+1)}{(1+(b+1)(\sigma+N))(1+(b+1)J_1)} \right] \frac{(b+1)^2}{(1+(b+1)(\sigma+N))^2} \\ &= -\frac{(b+1)^4(N - (J_1 + 1))(\sigma+1)}{(1+(b+1)(\sigma+N))^2(1+(b+1)J_1)}. \end{aligned}$$

Then, the equilibrium investment  $\hat{\sigma}_b(J_1)$  is implicitly characterized by:

$$\begin{aligned} \hat{\sigma}_b(J_1) &= \frac{(b+1)^2}{2(1+(b+1)(\hat{\sigma}_b(J_1)+N))^2} + \frac{(b+1)^4(N - (J_1 + 1))(\hat{\sigma}_b(J_1)+1)}{(1+(b+1)(\hat{\sigma}_b(J_1)+N))^2(1+(b+1)J_1)} \\ &= \frac{(b+1)^2 [1+(b+1)J_1 + 2(b+1)^2 ((N - (J_1 + 1))(\hat{\sigma}_b(J_1)+1))]}{2(1+(b+1)J_1)(1+(b+1)(\hat{\sigma}_b(J_1)+N))^2}. \end{aligned} \quad (1.4)$$

Note that for  $J_1 = N - 1$  (the most intense competition), expression (1.4) coincides with (1.1). Because the function (1.4) is in implicit form, I make use of Matlab to obtain the solution of  $\hat{\sigma}(J_1)$  for any set  $J_1 \subset N$  (Matlab codes can be found at the end of the document). The following table gives the seller's efficient and equilibrium investment for any  $J_1 \subset N$ , and with  $N = 10$  sellers.

| $N = 10$                  | $b = 0$  | $b = 1$  |
|---------------------------|----------|----------|
| $\sigma_b^*$              | 0.003754 | 0.007171 |
| $\hat{\sigma}_b(J_1 = 9)$ | 0.003754 | 0.007171 |
| $\hat{\sigma}_b(J_1 = 8)$ | 0.004545 | 0.010321 |
| $\hat{\sigma}_b(J_1 = 7)$ | 0.005514 | 0.014123 |
| $\hat{\sigma}_b(J_1 = 6)$ | 0.006727 | 0.018804 |
| $\hat{\sigma}_b(J_1 = 5)$ | 0.008291 | 0.024708 |
| $\hat{\sigma}_b(J_1 = 4)$ | 0.010382 | 0.032385 |
| $\hat{\sigma}_b(J_1 = 3)$ | 0.013323 | 0.042775 |
| $\hat{\sigma}_b(J_1 = 2)$ | 0.017761 | 0.057621 |
| $\hat{\sigma}_b(J_1 = 1)$ | 0.025234 | 0.080569 |

## 2. Buyer's investment

With regards to the buyer's investment decision, he invests if the fixed cost of investment stay below the gains from the investment that he can appropriate. Then, the buyer's efficient investment decision is to invest whenever  $k \leq K^*$ , and not to invest otherwise. The efficient buyer's investment threshold is:

$$K^* \equiv TS^*(1, \sigma_1^*) - TS^*(0, \sigma_0^*) - (\psi(\sigma_1^*) - \psi(\sigma_0^*)),$$

where

$$\begin{aligned} TS^*(1, \sigma_1^*) &= 2 \left( X^*(1, \sigma_1^*) - (X^*(1, \sigma_1^*))^2/2 \right) - \frac{(x_1^*(1, \sigma_1^*))^2}{2(\sigma_1^* + 1)} - (N-1) \frac{(x_i^*(1, \sigma_1^*))^2}{2} \\ &= 2 \left( \frac{2(\sigma_1^* + N)}{1 + 2(\sigma_1^* + N)} - \frac{\left( \frac{2(\sigma_1^* + N)}{1 + 2(\sigma_1^* + N)} \right)^2}{2} \right) - \frac{\left( \frac{2(\sigma_1^* + 1)}{1 + 2(\sigma_1^* + N)} \right)^2}{2(\sigma_1^* + 1)} - (N-1) \frac{\left( \frac{2}{1 + 2(\sigma_1^* + N)} \right)^2}{2} \\ &= 2 \left( \frac{2(\sigma_1^* + N)(1 + 2(\sigma_1^* + N)) - 2(\sigma_1^* + N)^2}{(1 + 2(\sigma_1^* + N))^2} \right) - \frac{2(\sigma_1^* + N)}{(1 + 2(\sigma_1^* + N))^2} \\ &= 2 \left( \frac{2(\sigma_1^* + N)(1 + \sigma_1^* + N)}{(1 + 2(\sigma_1^* + N))^2} \right) - \frac{2(\sigma_1^* + N)}{(1 + 2(\sigma_1^* + N))^2} \\ &= \frac{2(\sigma_1^* + N)}{1 + 2(\sigma_1^* + N)}, \end{aligned}$$

$$\begin{aligned} TS^*(0, \sigma_0^*) &= (X^*(0, \sigma_0^*) - (X^*(0, \sigma_0^*))^2/2) - \frac{(x_1^*(0, \sigma_0^*))^2}{2(\sigma_0^* + 1)} - (N-1) \frac{(x_i^*(0, \sigma_0^*))^2}{2} \\ &= \left( \frac{(\sigma_0^* + N)}{1 + (\sigma_0^* + N)} - \frac{\left( \frac{(\sigma_0^* + N)}{1 + (\sigma_0^* + N)} \right)^2}{2} \right) - \frac{\left( \frac{(\sigma_0^* + 1)}{1 + (\sigma_0^* + N)} \right)^2}{2(\sigma_0^* + 1)} - (N-1) \frac{\left( \frac{1}{1 + (\sigma_0^* + N)} \right)^2}{2} \\ &= \frac{2(\sigma_0^* + N)(1 + \sigma_0^* + N) - (\sigma_0^* + N)^2}{2(1 + \sigma_0^* + N)^2} - \frac{\sigma_0^* + N}{2(1 + \sigma_0^* + N)^2} \\ &= \frac{(\sigma_0^* + N)(2 + \sigma_0^* + N)}{2(1 + \sigma_0^* + N)^2} - \frac{\sigma_0^* + N}{2(1 + \sigma_0^* + N)^2} \\ &= \frac{\sigma_0^* + N}{2(1 + \sigma_0^* + N)}, \end{aligned}$$

and

$$(\psi(\sigma_1^*) - \psi(\sigma_0^*)) = \left( \frac{(\sigma_1^*)^2}{2} - \frac{(\sigma_0^*)^2}{2} \right).$$

Collecting terms gives:

$$K^* = \frac{2(\sigma_1^* + N)}{1 + 2(\sigma_1^* + N)} - \frac{(\sigma_0^* + N)}{2(1 + \sigma_0^* + N)} - \frac{1}{2}(\sigma_1^* + \sigma_0^*)(\sigma_1^* - \sigma_0^*).$$

In equilibrium, the buyer invests if  $k \leq \hat{K}(J)$  and decides not to invest otherwise. The buyer's equilibrium investment threshold is:

$$\begin{aligned}\hat{K}(J) &\equiv TS^*(1, \hat{\sigma}_1(J_1)) - TS^*(0, \hat{\sigma}_0(J_1)) \\ &\quad - \sum_{i \in N} [(T_i^*(1, \hat{\sigma}_1(J_1) | J_i) - C_i(x_i^*(1, \hat{\sigma}_1(J_1)))) - (T_i^*(0, \hat{\sigma}_0(J_1) | J_i) - C_i(x_i^*(0, \hat{\sigma}_0(J_1))))] \\ &= -(N-1)(TS^*(1, \hat{\sigma}_1(J_1)) - TS^*(0, \hat{\sigma}_0(J_1))) + \left( \tilde{TS}_{-1}(1, \hat{\sigma}_1(J_1) | J_1) - \tilde{TS}_{-1}(0, \hat{\sigma}_0(J_1) | J_1) \right) \\ &\quad + (N-1) \left( \tilde{TS}_{-i}(1, \hat{\sigma}_1(J_1) | J_i) - \tilde{TS}_{-i}(0, \hat{\sigma}_0(J_1) | J_i) \right)\end{aligned}$$

For the calculation of the investing threshold of  $\hat{K}(J)$ , I simplify each of the elements. Then:

$$-(N-1)TS^*(1, \hat{\sigma}_1(J_1)) = -\frac{2(N-1)(\hat{\sigma}_1(J_1) + N)}{1 + 2(\hat{\sigma}_1(J_1) + N)}.$$

$$(N-1)TS^*(0, \hat{\sigma}_0(J_1)) = \frac{(N-1)(\hat{\sigma}_0(J_1) + N)}{2(1 + \hat{\sigma}_0(J_1) + N)}.$$

$$\begin{aligned}\tilde{TS}_{-1}(1, \hat{\sigma}_1(J_1) | J_1) &= 2 \left( (X_{-\{J_1, 1\}}^*(1, \hat{\sigma}_1(J_1)) + \sum_{j \in J_1} \tilde{x}_j(1, \hat{\sigma}_1(J_1)) - \frac{(X_{-\{J_1, 1\}}^*(1, \hat{\sigma}_1(J_1)) + \sum_{j \in J_1} \tilde{x}_j(1, \hat{\sigma}_1(J_1)))^2}{2} \right) \\ &\quad - \sum_{i \neq \{J_1, 1\}} C_i(x_i^*(1, \hat{\sigma}_1(J_1))) - \sum_{j \in J_1} C_j(\tilde{x}_j(1, \hat{\sigma}_1(J_1))) \\ &= 2 \left( \frac{2[N + 2J_1(N + \hat{\sigma}_1(J_1)) - 1]}{(1 + 2(\hat{\sigma}_1(J_1) + N))(1 + 2J_1)} - \frac{\left( \frac{2[N + 2J_1(N + \hat{\sigma}_1(J_1)) - 1]}{(1 + 2(\hat{\sigma}_1(J_1) + N))(1 + 2J_1)} \right)^2}{2} \right) \\ &\quad - (N - (J_1 + 1)) \frac{\left( \frac{2}{1 + 2(\hat{\sigma}_1(J_1) + N)} \right)^2}{2} - J_1 \frac{\left( \frac{2[1 + 2(\hat{\sigma}_1(J_1) + J_1 + 1)]}{(1 + 2(\hat{\sigma}_1(J_1) + N))(1 + 2J_1)} \right)^2}{2} \\ &= 2 \left( \frac{2[N + 2J_1(N + \hat{\sigma}_1(J_1)) - 1]}{(1 + 2(\hat{\sigma}_1(J_1) + N))(1 + 2J_1)} - \frac{2[N + 2J_1(N + \hat{\sigma}_1(J_1)) - 1]^2}{(1 + 2(\hat{\sigma}_1(J_1) + N))^2(1 + 2J_1)^2} \right) - (N - J_1 - 1) \frac{2}{(1 + 2(\hat{\sigma}_1(J_1) + N))^2} \\ &\quad - J_1 \frac{2[1 + 2(\hat{\sigma}_1(J_1) + J_1 + 1)]^2}{(1 + 2(\hat{\sigma}_1(J_1) + N))^2(1 + 2J_1)^2} \\ &= \frac{4[N + 2J_1(N + \hat{\sigma}_1(J_1)) - 1]}{(1 + 2(\hat{\sigma}_1(J_1) + N))(1 + 2J_1)} \left( \frac{(1 + 2(\hat{\sigma}_1(J_1)(J_1 + N))(1 + 2J_1) - [N + 2J_1(N + \hat{\sigma}_1(J_1)) - 1]}{(1 + 2(\hat{\sigma}_1(J_1) + N))(1 + 2J_1)} \right) \\ &\quad - (N - J_1 - 1) \frac{2}{(1 + 2(\hat{\sigma}_1(J_1) + N))^2} - J_1 \frac{2[1 + 2(\hat{\sigma}_1(J_1) + J_1 + 1)]^2}{(1 + 2(\hat{\sigma}_1(J_1) + N))^2(1 + 2J_1)^2} \\ &= \frac{4[N + 2J_1(N + \hat{\sigma}_1(J_1)) - 1]}{(1 + 2(\hat{\sigma}_1(J_1) + N))(1 + 2J_1)} \left( \frac{2(1 + J_1)(1 + \hat{\sigma}_1(J_1)) + N(1 + 2J_1)}{(1 + 2(\hat{\sigma}_1(J_1) + N))(1 + 2J_1)} \right) - (N - J_1 - 1) \frac{2}{(1 + 2(\hat{\sigma}_1(J_1) + N))^2} \\ &\quad - J_1 \frac{2[1 + 2(\hat{\sigma}_1(J_1) + J_1 + 1)]^2}{(1 + 2(\hat{\sigma}_1(J_1) + N))^2(1 + 2J_1)^2}.\end{aligned}$$

$$\begin{aligned}
\tilde{T}S_{-1}(0, \hat{\sigma}_0(J_1) \mid J_1) &= \\
& 2 \left( (X_{-\{J_1, 1\}}^*(0, \hat{\sigma}_0(J_1)) + \sum_{j \in J_1} \tilde{x}_j(0, \hat{\sigma}_0(J_1)) - \frac{(X_{-\{J_1, 1\}}^*(0, \hat{\sigma}_0(J_1)) + \sum_{j \in J_1} \tilde{x}_j(0, \hat{\sigma}_0(J_1))^2}{2} \right) \\
& - \sum_{i \neq \{J_1, 1\}} C_i(x_i^*(0, \hat{\sigma}_0(J_1))) - \sum_{j \in J_1} C_j(\tilde{x}_j(0, \hat{\sigma}_0(J_1))) \\
& = \left( \frac{[N + J_1(N + \hat{\sigma}_0(J_1)) - 1]}{(1 + (\hat{\sigma}_0(J_1) + N))(1 + J_1)} - \frac{\left( \frac{[N + J_1(N + \hat{\sigma}_0(J_1)) - 1]}{(1 + (\hat{\sigma}_0(J_1) + N))(1 + J_1)} \right)^2}{2} \right) - (N - (J_1 + 1)) \frac{\left( \frac{1}{1 + (1 + \hat{\sigma}_0(J_1))} \right)^2}{2} \\
& - J_1 \frac{\left( \frac{[1 + (\hat{\sigma}_0(J_1) + J_1 + 1)]}{(1 + (\hat{\sigma}_0(J_1) + N))(1 + J_1)} \right)^2}{2} \\
& = - \left( \frac{[N + J_1(N + \hat{\sigma}_0(J_1)) - 1]}{(1 + \hat{\sigma}_0(J_1) + N)(1 + J_1)} - \frac{[N + J_1(N + \hat{\sigma}_0(J_1)) - 1]^2}{2(1 + \hat{\sigma}_0(J_1) + N)^2(1 + J_1)^2} \right) + (N - J_1 - 1) \frac{1}{2(1 + \hat{\sigma}_0(J_1) + N)^2} \\
& + J_1 \frac{[2 + \hat{\sigma}_0(J_1) + J_1]^2}{2(1 + \hat{\sigma}_0(J_1) + N)^2(1 + J_1)^2} \\
& = - \frac{[N + J_1(N + \hat{\sigma}_0(J_1)) - 1]}{(1 + \hat{\sigma}_0(J_1) + N)(1 + J_1)} \left( \frac{2(1 + \hat{\sigma}_0(J_1) + N)(1 + J_1) - [N + J_1(N + \hat{\sigma}_0(J_1)) - 1]}{2(1 + \hat{\sigma}_0(J_1) + N)(1 + J_1)} \right) \\
& + \frac{1}{2(1 + \hat{\sigma}_0(J_1) + N)^2} \left[ N - J_1 - 1 + J_1 \frac{[2 + \hat{\sigma}_0(J_1) + J_1]^2}{(1 + J_1)^2} \right] \\
& = - \frac{[N + J_1(N + \hat{\sigma}_0(J_1)) - 1]}{(1 + \hat{\sigma}_0(J_1) + N)(1 + J_1)} \left( \frac{1 + \hat{\sigma}_0(J_1) + (2 + \hat{\sigma}_0(J_1) + N)(1 + J_1)}{2(1 + \hat{\sigma}_0(J_1) + N)(1 + J_1)} \right) + \frac{1}{2(1 + \hat{\sigma}_0(J_1) + N)^2} [N - J_1 - 1 \\
& + J_1 \frac{[2 + \hat{\sigma}_0(J_1) + J_1]^2}{(1 + J_1)^2} ].
\end{aligned}$$

Where the trading quantities  $\tilde{x}_j$  and  $(X_{-\{J_1, 1\}}^* + \sum_{j \in J_1} \tilde{x}_j)$  in the third and fourth line of  $\tilde{T}S_{-1}(1, \hat{\sigma}_1(J_1) \mid J_1)$  and  $\tilde{T}S_{-1}(0, \hat{\sigma}_0(J_1) \mid J_1)$  are obtained from expressions (1.2) and (1.3) respectively. For the calculations of  $TS_{-i}(b, \sigma \mid J_i)$ , note that:

$$\tilde{T}S_{-i}(b, \sigma \mid J_i) = U \left( X_{-\{J_i, i\}}^* + \tilde{x}_1 + \sum_{j \in J_i \setminus \{1\}} \tilde{x}_j \right) - \sum_{l \in N \setminus \{J_i, i\}} C_l(x_l^*) - C_1(\tilde{x}_1) - \sum_{j \in J_i \setminus \{1\}} C_j(\tilde{x}_j)$$

To obtain the quantities  $\tilde{x}_1$  and  $\tilde{x}_j$ , I use the optimal conditions:

$$\begin{aligned}
U_x \left( X_{-\{J_i, i\}}^* + \tilde{x}_1 + \sum_{j \in J_i \setminus \{1\}} \tilde{x}_j \right) &= \frac{\tilde{x}_1}{\sigma + 1} = C_x(\tilde{x}_1 \mid \sigma), \\
U_x \left( X_{-\{J_i, i\}}^* + \tilde{x}_1 + \sum_{j \in J_i \setminus \{1\}} \tilde{x}_j \right) &= \tilde{x}_j = C_x(\tilde{x}_j)
\end{aligned}$$

Using the functional form for  $U(X \mid b)$  and simple algebra gives:

$$\tilde{x}_1 = \frac{(\sigma + 1)(b + 1)[1 + (b + 1)(\sigma + J_i + 1)]}{(1 + (b + 1)(\sigma + N))(1 + (b + 1)(J_i + \sigma))} \quad (2.1)$$

and

$$\tilde{x}_j = \frac{(b+1)[1+(b+1)(\sigma+J_i+1)]}{(1+(b+1)(\sigma+N))(1+(b+1)(J_i+\sigma))}. \quad (2.2)$$

Then,

$$\begin{aligned} X_{-\{J_i, i\}}^* + \tilde{x}_1 + \sum_{j \in J_i \setminus \{1\}} \tilde{x}_j &= (N - (J_i + 1)) \frac{b+1}{(1+(b+1)(\sigma+N))} + \frac{(\sigma+1)(b+1)[1+(b+1)(\sigma+J_i+1)]}{(1+(b+1)(\sigma+N))(1+(b+1)(J_i+\sigma))} \\ &+ (J_i - 1) \frac{(b+1)[1+(b+1)(\sigma+J_i+1)]}{(1+(b+1)(\sigma+N))(1+(b+1)(J_i+\sigma))} = \frac{(b+1)[1+(b+1)(\sigma+J_i)(\sigma+N)]}{(1+(b+1)(\sigma+N))(1+(b+1)(J_i+\sigma))} \end{aligned} \quad (2.3)$$

This solution satisfies Lemma (2) because  $X^* > X_{-\{J_i, i\}}^* + \tilde{x}_1 + \sum_{j \in J_i \setminus \{1\}} \tilde{x}_j$ ,

$$\begin{aligned} X^* &= \frac{(b+1)(\sigma+N)}{1+(b+1)(\sigma+N)} > \frac{(b+1)[1+(b+1)(\sigma+J_i)(\sigma+N)]}{(1+(b+1)(\sigma+N))(1+(b+1)(J_i+\sigma))} = X_{-\{J_i, i\}}^* + \tilde{x}_1 + \sum_{j \in J_i \setminus \{1\}} \tilde{x}_j \\ &\iff (\sigma+N)(1+(b+1)(\sigma+J_i)) > 1+(b+1)(\sigma+J_i)(\sigma+N) \iff \sigma + (N-1) > 0. \end{aligned}$$

Introducing the result of (2.3) into  $\tilde{T}\tilde{S}_{-i}(b, \sigma \mid J_i)$  gives:

$$\begin{aligned} (N-1)\tilde{T}\tilde{S}_{-i}(1, \hat{\sigma}_1(J_1) \mid J_i) &= \\ &2(N-1) \left( \frac{2[1+2(\hat{\sigma}_1(J_1)+J_i)(\hat{\sigma}_1(J_1)+N)]}{(1+2(\hat{\sigma}_1(J_1)+N))(1+2(J_i+\hat{\sigma}_1(J_1)))} - \frac{\left( \frac{2[1+2(\hat{\sigma}_1(J_1)+J_i)(\hat{\sigma}_1(J_1)+N)]}{(1+2(\hat{\sigma}_1(J_1)+N))(1+2(J_i+\hat{\sigma}_1(J_1)))} \right)^2}{2} \right) \\ &- (N-1)(N-(J_i+1)) \frac{\left( \frac{2}{(1+2(\hat{\sigma}_1(J_1)+N))} \right)^2}{2} - (N-1) \frac{\left( \frac{(\hat{\sigma}_1(J_1)+1)2[1+2(\hat{\sigma}_1(J_1)+J_i+1)]}{(1+2(\hat{\sigma}_1(J_1)+N))(1+2(J_i+\hat{\sigma}_1(J_1)))} \right)^2}{2} \\ &- (N-1)(J_i-1) \frac{\left( \frac{2[1+2(\hat{\sigma}_1(J_1)+J_i+1)]}{(1+2(\hat{\sigma}_1(J_1)+N))(1+2(J_i+\hat{\sigma}_1(J_1)))} \right)^2}{2} \\ &= (N-1) \left[ \frac{4[1+2(\hat{\sigma}_1(J_1)+J_i)(\hat{\sigma}_1(J_1)+N)]}{(1+2(\hat{\sigma}_1(J_1)+N))(1+2(J_i+\hat{\sigma}_1(J_1)))} - \frac{4[1+2(\hat{\sigma}_1(J_1)+J_i)(\hat{\sigma}_1(J_1)+N)]^2}{(1+2(\hat{\sigma}_1(J_1)+N))^2(1+2(J_i+\hat{\sigma}_1(J_1)))^2} \right] \\ &- (N-1)(N-J_i-1) \frac{2}{(1+2(\hat{\sigma}_1(J_1)+N))^2} - (N-1) \frac{2(\hat{\sigma}_1(J_1)+1)^2[1+2(\hat{\sigma}_1(J_1)+J_i+1)]^2}{(1+2(\hat{\sigma}_1(J_1)+N))^2(1+2(J_i+\hat{\sigma}_1(J_1)))^2} \\ &- (N-1)(J_i-1) \frac{2[1+2(\hat{\sigma}_1(J_1)+J_i+1)]^2}{(1+2(\hat{\sigma}_1(J_1)+N))^2(1+2(J_i+\hat{\sigma}_1(J_1)))^2} \\ &= (N-1) \frac{4[1+2(\hat{\sigma}_1(J_1)+J_i)(\hat{\sigma}_1(J_1)+N)]}{(1+2(\hat{\sigma}_1(J_1)+N))(1+2(J_i+\hat{\sigma}_1(J_1)))} \left[ \frac{2(\hat{\sigma}_1(J_1)+J_i)+2(\hat{\sigma}_1(J_1)+N)(1+\hat{\sigma}_1(J_1)+J_i)}{(1+2(\hat{\sigma}_1(J_1)+N))(1+2(J_i+\hat{\sigma}_1(J_1)))} \right] \\ &- (N-1)(N-J_i-1) \frac{2}{(1+2(\hat{\sigma}_1(J_1)+N))^2} \\ &- \frac{2(N-1)[1+2(\hat{\sigma}_1(J_1)+J_i+1)]^2}{(1+2(\hat{\sigma}_1(J_1)+N))^2(1+2(J_i+\hat{\sigma}_1(J_1)))^2} [2(\hat{\sigma}_1(J_1)+1)^2+J_i-1]. \end{aligned}$$

$$\begin{aligned}
& \tilde{T}S_{-i}(0, \hat{\sigma}_0(J_1) \mid J_i) = \\
& \left( \frac{[1 + (\hat{\sigma}_0(J_1) + J_i)(\hat{\sigma}_0(J_1) + N)]}{(1 + (\hat{\sigma}_0(J_1) + N))(1 + (J_i + \hat{\sigma}_0(J_1)))} - \frac{\left( \frac{[1 + (\hat{\sigma}_0(J_1) + J_i)(\hat{\sigma}_0(J_1) + N)]}{(1 + (\hat{\sigma}_0(J_1) + N))(1 + (J_i + \hat{\sigma}_0(J_1)))} \right)^2}{2} \right) \\
& - (N - (J_i + 1)) \frac{\left( \frac{1}{(1 + (\hat{\sigma}_0(J_1) + N))} \right)^2}{2} - \frac{\left( \frac{(\hat{\sigma}_0(J_1) + 1)[1 + (\hat{\sigma}_0(J_1) + J_i + 1)]}{(1 + (\hat{\sigma}_0(J_1) + N))(1 + (J_i + \hat{\sigma}_0(J_1)))} \right)^2}{2} \\
& - (J_i - 1) \frac{\left( \frac{[1 + (\hat{\sigma}_0(J_1) + J_i + 1)]}{(1 + (\hat{\sigma}_0(J_1) + N))(1 + (J_i + \hat{\sigma}_0(J_1)))} \right)^2}{2} \\
& = -(N - 1) \left( \frac{[1 + (\hat{\sigma}_0(J_1) + J_i)(\hat{\sigma}_0(J_1) + N)]}{(1 + \hat{\sigma}_0(J_1) + N)(1 + J_i + \hat{\sigma}_0(J_1))} - \frac{[1 + (\hat{\sigma}_0(J_1) + J_i)(\hat{\sigma}_0(J_1) + N)]^2}{2(1 + \hat{\sigma}_0(J_1) + N)^2(1 + J_i + \hat{\sigma}_0(J_1))^2} \right) \\
& + (N - 1)(N - J_i - 1) \frac{1}{2(1 + \hat{\sigma}_0(J_1) + N)^2} + (N - 1) \frac{(\hat{\sigma}_0(J_1) + 1)^2 [2 + \hat{\sigma}_0(J_1) + J_i]^2}{2(1 + \hat{\sigma}_0(J_1) + N)^2(1 + J_i + \hat{\sigma}_0(J_1))^2} \\
& + (N - 1)(J_i - 1) \frac{[2 + \hat{\sigma}_0(J_1) + J_i]^2}{2(1 + \hat{\sigma}_0(J_1) + N)^2(1 + J_i + \hat{\sigma}_0(J_1))^2} \\
& = -(N - 1) \frac{[1 + (\hat{\sigma}_0(J_1) + J_i)(\hat{\sigma}_0(J_1) + N)]}{(1 + \hat{\sigma}_0(J_1) + N)(1 + J_i + \hat{\sigma}_0(J_1))} \left( \frac{1 + 4\hat{\sigma}_0(J_1) + 2(J_i + N) + (\hat{\sigma}_0(J_1) + J_i)(\hat{\sigma}_0(J_1) + N)}{2(1 + \hat{\sigma}_0(J_1) + N)(1 + J_i + \hat{\sigma}_0(J_1))} \right) \\
& + (N - 1)(N - J_i - 1) \frac{1}{2(1 + \hat{\sigma}_0(J_1) + N)^2} + \frac{(N - 1)(2 + \hat{\sigma}_0(J_1) + J_i)^2}{2(1 + \hat{\sigma}_0(J_1) + N)^2(1 + J_i + \hat{\sigma}_0(J_1))^2} [(\hat{\sigma}_0(J_1) + 1)^2 + J_i - 1]
\end{aligned}$$

Where the trading quantities  $\tilde{x}_1$ ,  $\tilde{x}_j$  and  $X_{-\{J_i, i\}}^* + \tilde{x}_1 + \sum_{j \in J_i \setminus \{1\}} \tilde{x}_j$  for  $\tilde{T}S_{-i}(1, \hat{\sigma}_1(J_1) \mid J_i)$  and  $\tilde{T}S_{-i}(0, \hat{\sigma}_0(J_i) \mid J_1)$  are obtained from expressions (2.1), (2.2) and (2.3) respectively. Collecting all the previous terms, the buyer's equilibrium investment threshold  $\hat{K}(J)$  becomes:

$$\begin{aligned}
\hat{K}(J) = & -\frac{2(N + 1)(\hat{\sigma}_1(J_1) + N)}{1 + 2(\hat{\sigma}_1(J_1) + N)} + \frac{(N - 1)(\hat{\sigma}_0(J_1) + N)}{2(1 + \hat{\sigma}_0(J_1) + N)} \\
& + \frac{4[N + 2J_1(N + \hat{\sigma}_1(J_1)) - 1]}{(1 + 2(\hat{\sigma}_1(J_1) + N))(1 + 2J_1)} \left( \frac{2(1 + J_1)(1 + \hat{\sigma}_1(J_1)) + N(1 + 2J_1)}{(1 + 2(\hat{\sigma}_1(J_1) + N))(1 + 2J_1)} \right) - (N - J_1 - 1) \frac{2}{(1 + 2(\hat{\sigma}_1(J_1) + N))^2} \\
& - J_1 \frac{2[1 + 2(\hat{\sigma}_1(J_1) + J_1 + 1)]^2}{(1 + 2(\hat{\sigma}_1(J_1) + N))^2(1 + 2J_1)^2} + \frac{1}{2(1 + \hat{\sigma}_0(J_1) + N)^2} \left[ N - J_1 - 1 + J_1 \frac{[2 + \hat{\sigma}_0(J_1) + J_1]^2}{(1 + J_1)^2} \right] \\
& - \frac{[N + J_1(N + \hat{\sigma}_0(J_1)) - 1]}{(1 + \hat{\sigma}_0(J_1) + N)(1 + J_1)} \left( \frac{1 + \hat{\sigma}_0(J_1) + (2 + \hat{\sigma}_0(J_1) + N)(1 + J_1)}{2(1 + \hat{\sigma}_0(J_1) + N)(1 + J_1)} \right) + \frac{1}{2(1 + \hat{\sigma}_0(J_1) + N)^2} [N - J_1 - 1 \\
& + J_1 \frac{[2 + \hat{\sigma}_0(J_1) + J_1]^2}{(1 + J_1)^2}] \\
& + (N - 1) \frac{4[1 + 2(\hat{\sigma}_1(J_1) + J_i)(\hat{\sigma}_1(J_1) + N)]}{(1 + 2(\hat{\sigma}_1(J_1) + N))(1 + 2(J_i + \hat{\sigma}_1(J_1)))} \left[ \frac{2(\hat{\sigma}_1(J_1) + J_i) + 2(\hat{\sigma}_1(J_1) + N)(1 + \hat{\sigma}_1(J_1) + J_i)}{(1 + 2(\hat{\sigma}_1(J_1) + N))(1 + 2(J_i + \hat{\sigma}_1(J_1)))} \right] \\
& - (N - 1)(N - J_i - 1) \frac{2}{(1 + 2(\hat{\sigma}_1(J_1) + N))^2} - \frac{2(N - 1)[1 + 2(\hat{\sigma}_1(J_1) + J_i + 1)]^2}{(1 + 2(\hat{\sigma}_1(J_1) + N))^2(1 + 2(J_i + \hat{\sigma}_1(J_1)))^2} [2(\hat{\sigma}_1(J_1) + 1)^2 + J_i - 1] \\
& - (N - 1) \frac{[1 + (\hat{\sigma}_0(J_1) + J_i)(\hat{\sigma}_0(J_1) + N)]}{(1 + \hat{\sigma}_0(J_1) + N)(1 + J_i + \hat{\sigma}_0(J_1))} \left( \frac{1 + 4\hat{\sigma}_0(J_1) + 2(J_i + N) + (\hat{\sigma}_0(J_1) + J_i)(\hat{\sigma}_0(J_1) + N)}{2(1 + \hat{\sigma}_0(J_1) + N)(1 + J_i + \hat{\sigma}_0(J_1))} \right) \\
& + (N - 1)(N - J_i - 1) \frac{1}{2(1 + \hat{\sigma}_0(J_1) + N)^2} + \frac{(N - 1)(2 + \hat{\sigma}_0(J_1) + J_i)^2}{2(1 + \hat{\sigma}_0(J_1) + N)^2(1 + J_i + \hat{\sigma}_0(J_1))^2} [(\hat{\sigma}_0(J_1) + 1)^2 + J_i - 1].
\end{aligned}$$

For the calculation of  $\hat{K}(J)$ , I make use of Matlab (see the code at the end). The following table

gives the buyer's efficient and equilibrium investment threshold for any  $J \subset N$ , and  $N = 10$  sellers.

|              |          |
|--------------|----------|
| $K^*$        | 0.5978   |
| $\hat{K}(9)$ | 0.479314 |
| $\hat{K}(8)$ | 0.482745 |
| $\hat{K}(7)$ | 0.487170 |
| $\hat{K}(6)$ | 0.493026 |
| $\hat{K}(5)$ | 0.501004 |
| $\hat{K}(4)$ | 0.512164 |
| $\hat{K}(3)$ | 0.527778 |
| $\hat{K}(2)$ | 0.545794 |
| $\hat{K}(1)$ | 0.582257 |

### 3. Welfare

For the calculations of welfare, the efficient welfare is given by  $W^*(b^*, \sigma_b^*) = TS^*(b^*, \sigma_b^*) - kb^* - \psi(\sigma_b^*)$ , and depending on the efficient buyer's investment decision (invest or not invest), efficient welfare is equal to:

$$W^*(1, \sigma_1^*) = \frac{2(\sigma_1^* + N)}{1 + 2(\sigma_1^* + N)} - k - (\sigma_1^*)^2/2,$$

$$W^*(0, \sigma_0^*) = \frac{(\sigma_0^* + N)}{2 + 2(\sigma_0^* + N)} - (\sigma_0^*)^2/2.$$

For any other equilibrium, the welfare generated depends on the equilibrium investment  $(\hat{b}(J), \hat{\sigma}_b(J_1))$ , therefore  $\hat{W}(\hat{b}(J), \hat{\sigma}_b(J_1)) = TS^*(\hat{b}(J), \hat{\sigma}_b(J_1)) - k\hat{b}(J) - \psi(\hat{\sigma}_b(J_1))$ . Therefore,

$$\hat{W}(1, \hat{\sigma}_1(J_1)) = \frac{2(\hat{\sigma}_1(J_1) + N)}{1 + 2(\hat{\sigma}_1(J_1) + N)} - k - (\hat{\sigma}_1(J_1))^2/2,$$

$$\hat{W}(0, \hat{\sigma}_0(J_1)) = \frac{2(\hat{\sigma}_0(J_1) + N)}{2 + 2(\hat{\sigma}_0(J_1) + N)} - (\hat{\sigma}_0(J_1))^2/2$$

For the calculation of  $\hat{W}(J)$ , I make use of Python (see the code at the end). The following table gives the values of the efficient welfare and the equilibrium welfare for any  $J_1 \subset N$ , and  $N = 10$  sellers.

|                                 | $b = 1$   | $b = 0$   |
|---------------------------------|-----------|-----------|
| $W^*(b, \sigma_b^*)$            | 0.5023877 | 0.4545539 |
| $\hat{W}(b, \hat{\sigma}_b(9))$ | 0.5023877 | 0.4545539 |
| $\hat{W}(b, \hat{\sigma}_b(8))$ | 0.5023744 | 0.4545538 |
| $\hat{W}(b, \hat{\sigma}_b(7))$ | 0.5023451 | 0.4545530 |
| $\hat{W}(b, \hat{\sigma}_b(6))$ | 0.5022892 | 0.4545506 |
| $\hat{W}(b, \hat{\sigma}_b(5))$ | 0.5021875 | 0.4545453 |
| $\hat{W}(b, \hat{\sigma}_b(4))$ | 0.5020029 | 0.4545344 |
| $\hat{W}(b, \hat{\sigma}_b(3))$ | 0.5016593 | 0.4545116 |
| $\hat{W}(b, \hat{\sigma}_b(2))$ | 0.5009807 | 0.4544610 |
| $\hat{W}(b, \hat{\sigma}_b(1))$ | 0.4994978 | 0.4543311 |

## Matlab and Python Codes

---

### 4. Matlab code for the solution of the seller's equilibrium investment

```
1  NumIter = 500;
2  Tolerance = 0.0000001;
3  InitVal = 0.02;
4
5  N = 10;
6  for J1 = 1:9
7      b = 0;
8      SigmaRightFcn = @(SigmaVar)(b + 1)^2*(1 + (b + 1)*J1 + ...
9          (2*(b + 1)^2)*((N - (J1 + 1))*(SigmaVar + 1) ) ) / ...
10         (2*(1 + (b + 1)+J1)*(1 + (b + 1)*(SigmaVar + N))^2);
11      SigmaRightVal = FixedPointFcn(SigmaRightFcn, InitVal, Tolerance, ...
12          NumIter);
13      OutResults(J1,1:2) = [J1 , SigmaRightVal];
14      b = 1;
15      SigmaRightFcn = @(SigmaVar)(b + 1)^2*(1 + (b + 1)*J1 + ...
16          (2*(b + 1)^2)*((N - (J1 + 1))*(SigmaVar + 1) ) ) / ...
17         (2*(1 + (b + 1)+J1)*(1 + (b + 1)*(SigmaVar + N))^2);
18      SigmaRightVal = FixedPointFcn(SigmaRightFcn, InitVal, Tolerance, ...
19          NumIter);
20      OutResults(J1,3) = SigmaRightVal;
21  end
22  tablatex( flip( OutResults,1) );
23
24  function Value = FixedPointFcn(InFunction, x, Epsilon, Iter)
25      i = 1;
26      y = feval(InFunction, x);
27      while abs(y - x) > Epsilon && i + 1 < Iter
28          i = i + 1;
29          x = y;
```

```

30     y = feval(InFunction , x);
31 end
32     Value = y;
33 end
34
35 function tablatex(matrix)
36     fid = fopen('table.tex','w');
37     fprintf(fid, '\\documentclass{article}\\n');
38     fprintf(fid, '\\begin{document}\\n');
39     fprintf(fid, ' \\begin{tabular}{ | ');
40
41     for col=1:size(matrix,2)
42         fprintf(fid, '1 | ');
43     end
44     fprintf(fid, '}\\n\\hline\\n');
45
46     % now write the elements of the matrix
47     for r=1:size(matrix,1)
48         for c=1:size(matrix,2)
49             if c==size(matrix,2)
50                 fprintf(fid, '%f',matrix(r,c));
51             else
52                 if(c == 1)
53                     fprintf(fid, '$\\hat{\\sigma}(J_1= %d )$& ', ...
54                             matrix(r,c));
55                 else
56                     fprintf(fid, '%f & ',matrix(r,c));
57                 end
58             end
59         end
60
61         fprintf(fid, ' \\\\ \\hline \\n');
62     end
63     fprintf(fid, '\\hline\\n');
64     fprintf(fid, '\\end{tabular}\\n');
65     fprintf(fid, '\\end{document}\\n');
66     fclose(fid);
67 return

```

```
68 end
```

## 5. Matlab code for the solution of the buyer's equilibrium investment

```
1  NumIter = 500;
2  Tolerance = 0.0000001;
3  InitVal = 0.02;
4
5  N = 10;
6  for J1 = 1:9
7      b = 0;
8      SigmaRightFcn = @(SigmaVar)(b + 1)^2*(1 + (b + 1)*J1 + ...
9          (2*(b + 1)^2)*((N - (J1 + 1))*(SigmaVar + 1) ) ) / ...
10         (2*(1 + (b + 1)+J1)*(1 + (b + 1)*(SigmaVar + N))^2);
11      SigmaRightVal = FixedPointFcn(SigmaRightFcn, InitVal, Tolerance, ...
12          NumIter);
13      OutResults(J1,1:2) = [J1 , SigmaRightVal];
14      Sigma0 = SigmaRightVal;
15      b = 1;
16      SigmaRightFcn = @(SigmaVar)(b + 1)^2*(1 + (b + 1)*J1 + ...
17          (2*(b + 1)^2)*((N - (J1 + 1))*(SigmaVar + 1) ) ) / ...
18         (2*(1 + (b + 1)+J1)*(1 + (b + 1)*(SigmaVar + N))^2);
19      SigmaRightVal = FixedPointFcn(SigmaRightFcn, InitVal, Tolerance, ...
20          NumIter);
21      OutResults(J1,3) = SigmaRightVal;
22      Sigma1 = SigmaRightVal;
23      if(J1 == 9)
24          KStarT1 = (2*(Sigma1 + N))/((1 + 2*Sigma1 + 2*N));
25          KStarT2 = (Sigma0 + N)/(2*(1 + Sigma0 + N));
26          KStarT3 = (1/2)*(Sigma1 + Sigma0)*(Sigma1 - Sigma0);
27          KStar = KStarT1 - KStarT2 - KStarT3;
28      end
29      KJTerm1 = -(N - 1)*(2*(Sigma1 + N))/(1 + 2*(Sigma1 + N));
30      KJTerm2 = (N - 1)*(Sigma0 + N)/(2*(1 + Sigma0 + N));
31      J = J1;
32      Denom = (1 + 2*(Sigma1 + N))*(1 + 2*J);
```

```

33 Denom = Denom*Denom;
34 Term1 = 4*(N + 2*J*(N + Sigma1) - 1)*(2*(1 + J)*(1 + Sigma1) + ...
35     N*(1 + 2*J));
36 Term1 = Term1/Denom;
37 Term2 = 2*(N - J - 1)/((1 + 2*(Sigma1 + N))^2);
38 Term3 = J*2*(1 + 2*(Sigma1 + J + 1))^2;
39 Term3 = Term3/Denom;
40 KJTerm3 = Term1 - Term2 - Term3;
41
42 Denom = (1 + Sigma0 + N)*(1 + J);
43 Denom = 2*Denom*Denom;
44 Term1 = (N + J*(N + Sigma0) - 1)*(1 + Sigma0 + (2 + Sigma0 + N)* ...
45     (1 + J));
46 Term1 = Term1/Denom;
47 Term2 = N - J - 1 + J*((2 + Sigma0 + J)^2)/((1 + J)^2);
48 Term2 = Term2/(2*(1 + Sigma0 + N)^2);
49 KJTerm4 = (-1)*Term1 + Term2;
50
51 Denom = (1 + 2*(Sigma1 + N))*(1 + 2*(J + Sigma1));
52 Denom = Denom*Denom;
53 Term1 = (N - 1)*4*(1 + 2*(Sigma1 + J)*(Sigma1 + N))*(2*(Sigma1 + J) ...
54     + 2*(Sigma1 + N)*(1 + Sigma1 + J));
55 Term1 = Term1/Denom;
56 Term2 = (N - 1)*(N - J - 1)*2/((1 + 2*(Sigma1 + N))^2);
57 Term3 = 2*(N - 1)*((1 + 2*(Sigma1 + J + 1))^2)*(2*(Sigma1 + 1)^2 + ...
58     J - 1);
59 Term3 = Term3/Denom;
60 KJTerm5 = Term1 - Term2 - Term3;
61
62 Denom = (1 + Sigma0 + N)*(1 + J + Sigma0);
63 Denom = 2*Denom*Denom;
64 Term1 = (N - 1)*(1 + (Sigma0 + J)*(Sigma0 + N))*(1 + 4*Sigma0 + ...
65     2*(J + N) + (Sigma0 + J)*(Sigma0 + N));
66 Term1 = Term1/Denom;
67 Term2 = (N - 1)*(N - J - 1)/(2*((1 + Sigma0 + N)^2));
68 Term3 = (N - 1)*((2 + Sigma0 + J)^2)*((Sigma0 + 1)^2 + J - 1);
69 Term3 = Term3/Denom;
70 KJTerm6 = (-1)*Term1 + Term2 + Term3;

```

```

71     KJ = KJTerm1 + KJTerm2 + KJTerm3 + KJTerm4 + KJTerm5 + KJTerm6;
72
73     OutResults(J1,4) = KJ;
74 end
75
76     tablatex( flip( OutResults ,1) );
77
78     function Value = FixedPointFcn(InFunction , x, Epsilon , Iter)
79         i = 1;
80         y = feval(InFunction , x);
81         while abs(y - x) > Epsilon && i + 1 < Iter
82             i = i + 1;
83             x = y;
84             y = feval(InFunction , x);
85         end
86         Value = y;
87     end
88
89     function tablatex(matrix)
90         fid = fopen('table.tex','w');
91         fprintf(fid, '\\documentclass{article}\\n');
92         fprintf(fid, '\\begin{document}\\n');
93         fprintf(fid, ' \\begin{tabular}{ | ');
94
95         for col=1:size(matrix,2)
96             fprintf(fid, '1 | ');
97         end
98         fprintf(fid, '}\\n\\hline\\n');
99
100         % now write the elements of the matrix
101         for r=1:size(matrix,1)
102             for c=1:size(matrix,2)
103                 if c==size(matrix,2)
104                     fprintf(fid, '%f',matrix(r,c));
105                 else
106                     if(c == 1)
107                         fprintf(fid, '$\\hat{\\sigma}(J_1= %d )$& ', ...
108                             matrix(r,c));

```

```

109         else
110             fprintf(fid, '%f & ', matrix(r, c));
111         end
112     end
113 end
114
115     fprintf(fid, ' \\\ \\\hline \n');
116 end
117     fprintf(fid, '\\hline\n');
118     fprintf(fid, '\\end{tabular}\n');
119     fprintf(fid, '\\end{document}\n');
120     fclose(fid);
121     return
122 end

```

## 6. Python code for the efficient and equilibrium welfare

```

1  import math
2
3  x=[0.007171,0.007171,0.010321,0.014123,0.018804,0.024708,0.032385,0.042775,
4  0.057621,0.080569]
5
6  print("Buyer invest")
7  for i in range(10):
8      y=2*(x[i]+10)/(1+2*(x[i]+10)) -0.45 -(x[i]**2)/2
9      print(y)
10  print("Buyer does not invest")
11  X=[0.003754,0.003754,0.004545,0.005514,0.006727,0.008291,0.010382,0.013323,
12  0.017761,0.025234]
13
14  for i in range(10):
15      y=(x[i]+10)/(2+2*(x[i]+10)) -(x[i]**2)/2
16      print(y)

```
